# Supplementary material for: A Participatory Framework for Plain Language Clinical Management Guideline Development
Source: MDPI journal article supplement (doi:10.3390/ijerph192013506), 2022-10-19
Supplement: s1 [file s1]

## Supplementary material

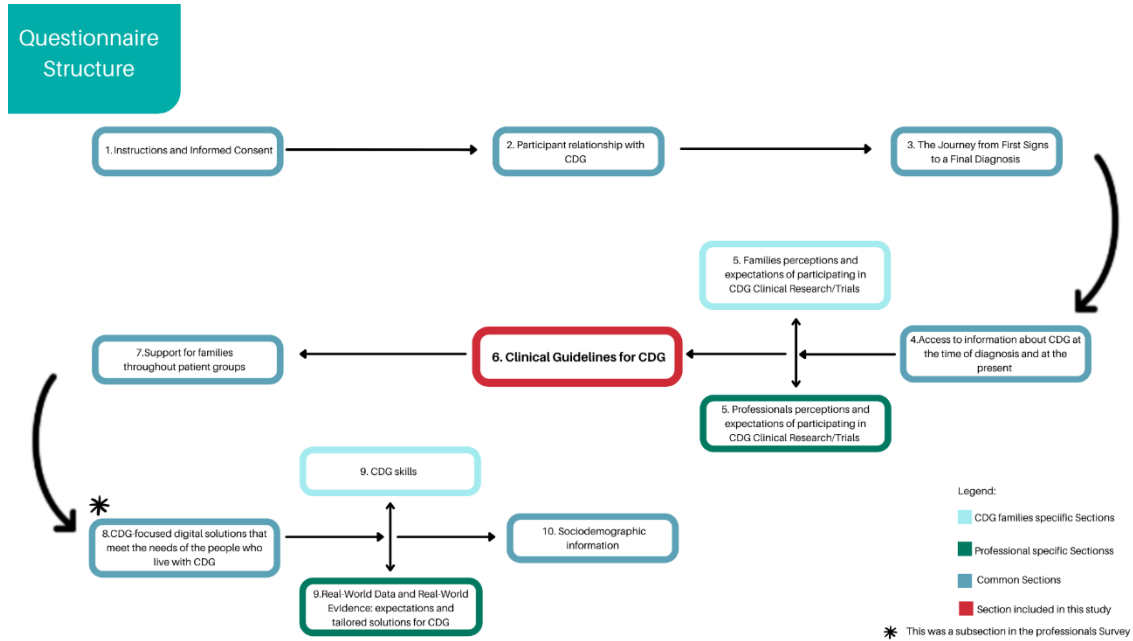

**Supplementary Figure S1. CDG Journey Mapping structure.** The sections specific for CDG families are coloured in light green while the professional-specific sections are represented in dark green. Sections common to both groups are shown in blue. The CMG section is highlighted in red.

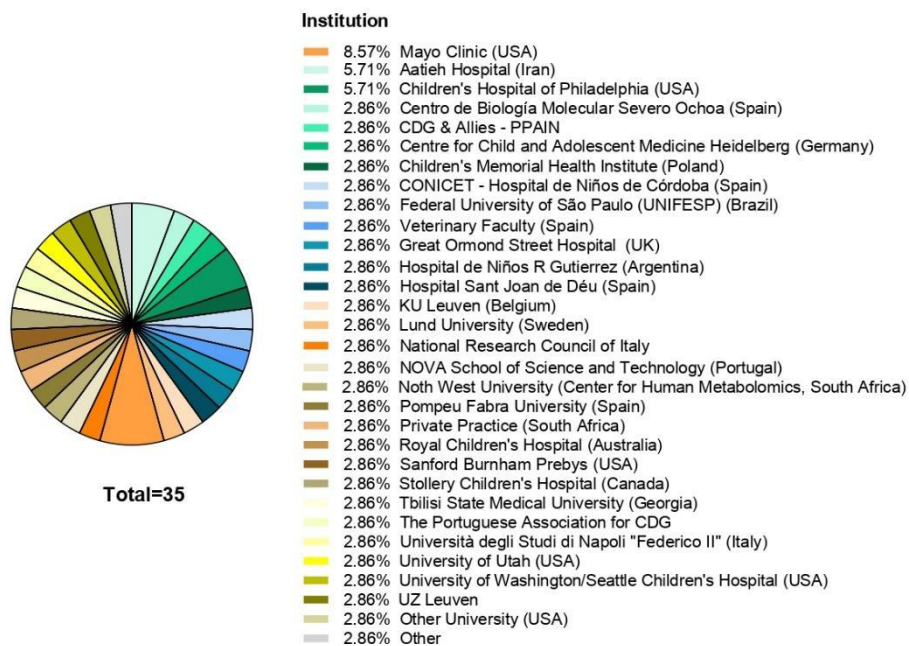

**Supplementary Figure S2. Affiliations of the professionals who completed the e-questionnaire.**
